# Supplementary material for: Examination of the Efficacy and Cross-Reactivity of a Novel Polyclonal Antibody Targeting the Disintegrin Domain in SVMPs to Neutralize Snake Venom
Source: PubMed Central journal article supplement (PMC8066378; doi:10.3390/toxins13040254), 2021-03-31
Supplement: toxins-13-00254-s001.pdf [file toxins-13-00254-s001.pdf]

## Supplementary Materials: Examination of the Efficacy and Cross-Reactivity of a Novel Polyclonal Antibody Targeting the Disintegrin Domain in SVMPs to Neutralize Snake Venom

Shelby S. Szteiter, Ilse N. Diego, Jonathan Ortegon, Eliana Salinas, Abcde Cirilo, Armando Reyes, Oscar Sanchez, Montamas Suntravat, Emelyn Salazar, Elda E. Sánchez and Jacob A. Galan

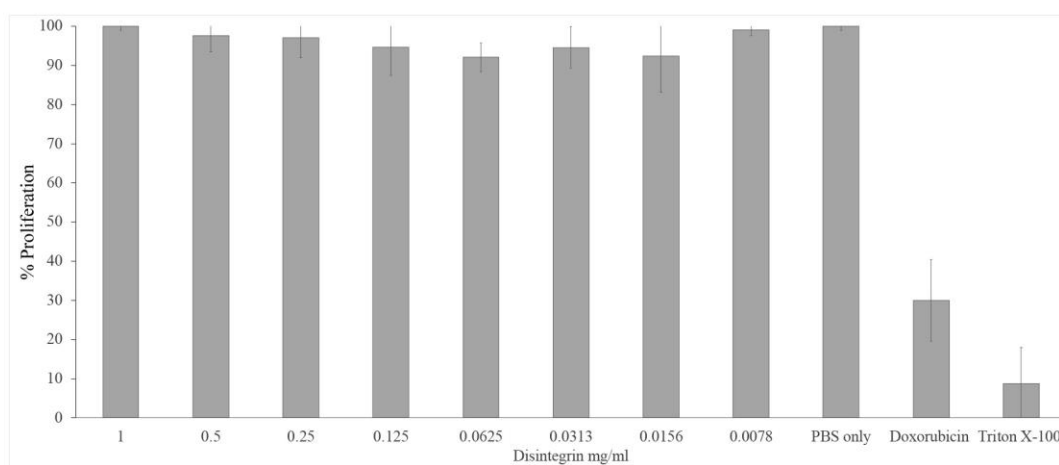

Figure S1. Cell proliferation assay.

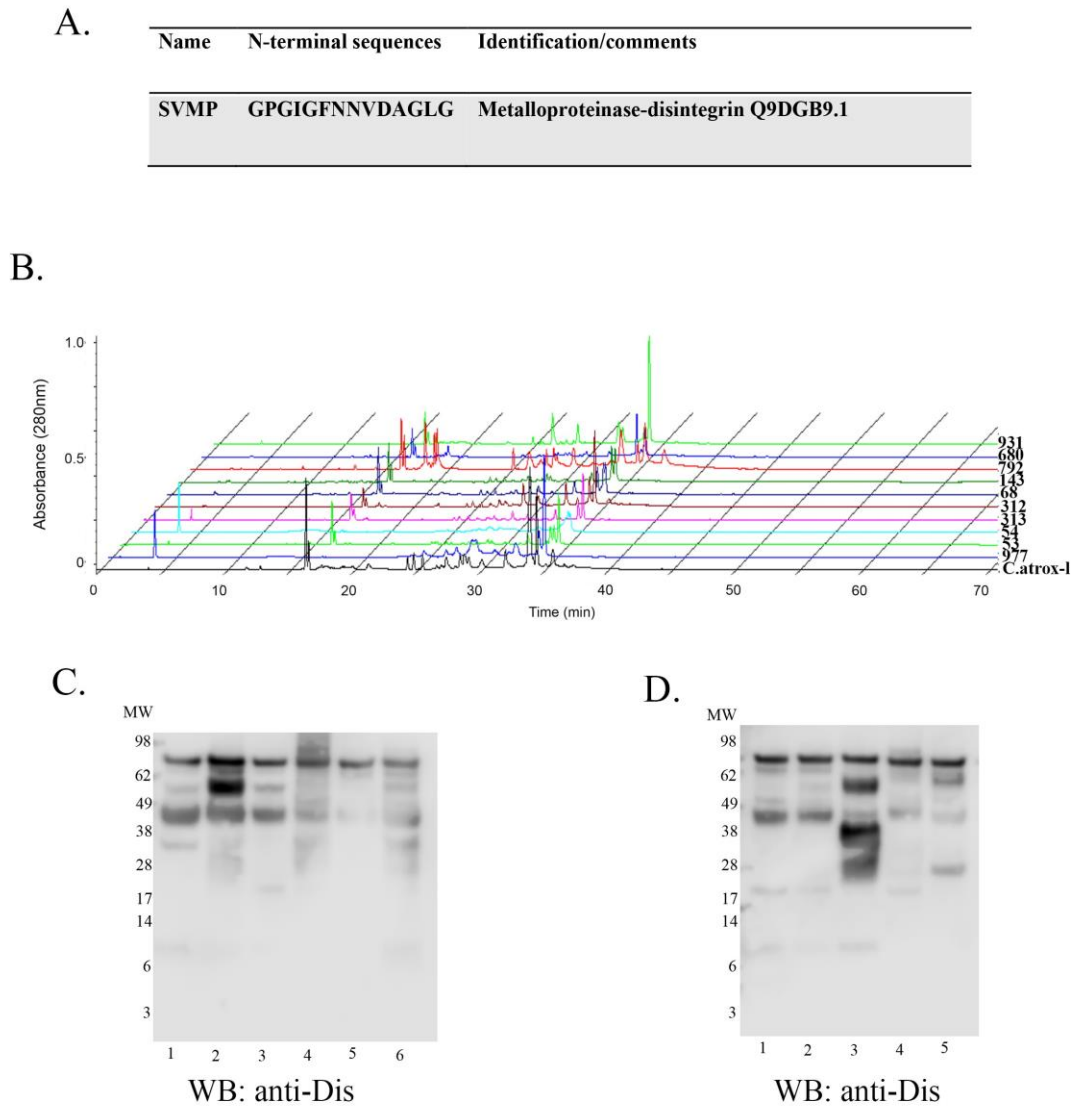

**Figure S2.** (A) N-terminal sequence of SVMP from *C. o. helleri*. The identity of the primary sequence was determined using Basic Local Alignment Search Tool (BLAST <http://blast.ncbi.nlm.nih.gov/Blast.cgi>). (B) HPLC profiles of crude venoms. A total of 500 µg was injected into a Reverse Phase C18 column as described in the Materials and Methods. (C) Western Blot of crude venoms probed with anti-disintegrin. Five micograms of crude venom was separated on SDS-PAGE and were transferred to an Immobilon® membrane (Millipore) using BioRad Trans-Blot SD Semi-Dry Transfer Cell at 100 V for 1 h and then leftover night. M: Seeblue® Plus 2 prestained standard (1X), lanes 1: *C. atrox* (Luke), Lane 2: *C. atrox* (977), Lane 3: *C. atrox* (53), Lane 4: *C. atrox* (54), Lane 5: *C. atrox* (313), Lane 6: *C. atrox* (312). (D) Western Blot crude venoms probed with anti-disintegrin M: Seeblue® Plus 2 prestained standard (1X), lanes 1: *C. atrox* (68), Lane 2: *C. atrox* (143), Lane 3: *C. helleri* (792), Lane 4: *C. helleri* (680), Lane 5: *C. s. scutulatus* (931).

A.

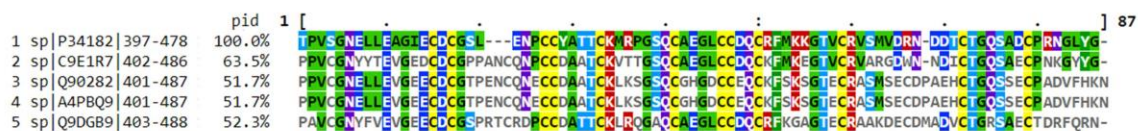

B.

| Species                 | Vial # | Location                | MGD (mg/mL) | Neutralized |
|-------------------------|--------|-------------------------|-------------|-------------|
| <i>C. atrox</i>         | Luke   | Kleberg Co, TX          | 0.5         | +           |
| <i>C. atrox</i>         | 977    | Kleberg Co, TX          | 2           | +           |
| <i>C. atrox</i>         | 53     | San Patricio Co, TX     | 0.5         | +           |
| <i>C. atrox</i>         | 54     | San Patricio Co, TX     | 1           | +           |
| <i>C. atrox</i>         | 313    | Pima Co, AZ             | 0.25        | +           |
| <i>C. atrox</i>         | 312    | Tucson Co, AZ           | 0.25        | +           |
| <i>C. atrox</i>         | 68     | La Salle/ Dimmit Co, TX | 0.25        | +           |
| <i>C. atrox</i>         | 143    | Culberson Co, TX        | 0.125       | +           |
| <i>C. o. helleri</i>    | 792    | NNTRC Serpentarium      | 2           | +           |
| <i>C. o. helleri</i>    | 680    | San Bernadino, Co. CA   | 0.125       | +           |
| <i>C. s. scutulatus</i> | 931    | Pima, Co. AZ            | 0.5         | +           |

**Figure S3.** (A) Sequence alignment of *C. atrox* SVMP PII. The alignment was generated with the ClustalW2 multiple sequence alignment program (<https://www.ebi.ac.uk/Tools/msa/clustalw2/>). (B) Table of Snake, identification, location and MGD of venom tested using anti-disintegrin.
